# Supplementary material for: Self-assembly of fluorocarbon-coated FePt nanoparticles for controlling structure and wettability of surfaces
Source: Royal Society of Chemistry journal article supplement (doi:10.1039/b808494g), 2008-07-29
Supplement: b808494g.pdf [file b808494g.pdf]

## Supporting Information

### Self-assembly of fluorocarbon coated FePt nanoparticles for controlling structure and wettability of surfaces

*Bappaditya Samanta, Yuval Ofir, Debabrata Patra, and Vincent M. Rotello\**

Department of Chemistry, University of Massachusetts, USA. Fax: 413-545-4490; Tel: 413-545-2058;

E-mail: rotello@chem.umass.edu

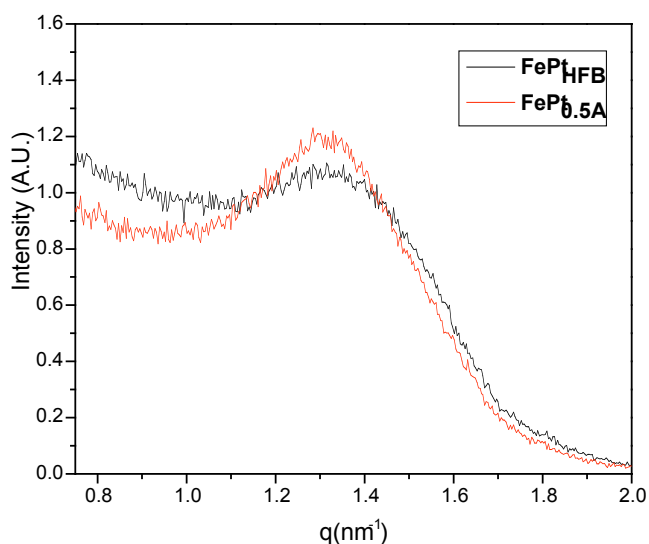

**S1:** SAXS profile of FePt<sub>HFB</sub> (blue) and FePt<sub>0.5A</sub> (red); both shows interparticle spacing ~ 4.7 nm

**S2:** movie showing the water droplet transfer from non-sticky superhydrophobic FePt<sub>HFB</sub> surface (bottom substrate) to a sticky superhydrophobic FePt<sub>0.5A</sub> surface (top substrate)
